# Supplementary material for: Consequences of Both Coxsackievirus B4 and Type 1 Diabetes on Female Non-Obese Diabetic Mouse Kidneys
Source: MDPI journal article supplement (doi:10.3390/microorganisms9112357), 2021-11-15
Supplement: s1 [file s1]

# Consequences of Both Cocksackievirus B4 and Type 1 Diabetes on Female Non-Obese Diabetic Mouse Kidneys

Debra L. Walter <sup>1,2,\*</sup>, Jean R. Thuma <sup>3</sup>, Ramiro Malgor <sup>1,4,5</sup>, Frank L. Schwartz <sup>3,5</sup>, Kelly D. McCall <sup>1,2,3,4,5,6,7,†</sup> and Karen T. Coschigano <sup>1,4,5,†</sup>

<sup>1</sup> Interdisciplinary Program in Molecular and Cellular Biology, Ohio University, Athens OH, 45701, USA; malgor@ohio.edu (R.M.); mcallk@ohio.edu (K.D.M.); coschigk@ohio.edu (K.T.C.)  
<sup>2</sup> Department of Biological Sciences, College of Arts and Sciences, Ohio University, Athens OH, 45701, USA  
<sup>3</sup> Department of Specialty Medicine, Heritage College of Osteopathic Medicine, Ohio University, Athens OH, 45701, USA; watts@ohio.edu (J.R.T.); endoguy.ou@gmail.com (F.L.S.)  
<sup>4</sup> Department of Biomedical Sciences; Heritage College of Osteopathic Medicine, Ohio University, Athens OH, 45701, USA  
<sup>5</sup> The Diabetes Institute, Heritage College of Osteopathic Medicine, Ohio University, Athens OH, 45701, USA  
<sup>6</sup> Translational Biomedical Sciences Program, Heritage College of Osteopathic Medicine, Ohio University, Athens OH, 45701, USA  
<sup>7</sup> Biomedical Engineering Program, Russ College of Engineering and Technology, Ohio University, Athens OH, 45701, USA  
\* Correspondence: debwalter@vt.edu  
† Denotes shared senior authorship

## Supplementary Materials

Supplementary Table S1. SYBR green primer names, sequences and references.

| Gene Name | Full Name                                | Strand | Sequence                                           | Reference |
|-----------|------------------------------------------|--------|----------------------------------------------------|-----------|
| CVB4      | Coxsackievirus B4                        | +<br>− | CCCACAGGACGCTCTAATA<br>CAGAGTTACCCGTTACGACA        | [1]       |
| Tlr3      | Toll Like Receptor 3                     | +<br>− | AATCCTTGCGTTGCGAAGTG<br>GGTTCAGTTGGGCGTTGTTC       | [2]       |
| Ifnb1     | Interferon Beta                          | +<br>− | ATAAGCAGCTCCAGCTCCAA<br>CTGTCTGCTGGTGGAGTTCA       | [2]       |
| Tnfa      | Tumor Necrosis Factor Alpha              | +<br>− | CGGTCCCCAAAGGGATGAG<br>CCTTGAAGAGAACCCTGGGAGTA     | [2]       |
| Tgfb1     | Transforming Growth Factor Beta          | +<br>− | TTGCTTCAGCTCCACAGAGA<br>CGGGTTGTGTTGGTTGTAGA       | [2]       |
| Fn1       | Fibronectin                              | +<br>− | CTTTGGCAGTGGTCATTTC<br>TGGTAGGTCTTCCCATCGTC        | [2]       |
| Havcr1    | Hepatitis A Virus Cellular Receptor 1    | +<br>− | TCCACACATGTACCAACATCAA<br>TGCTCATGGGGACAAAATG      | [2]       |
| Il6       | Interleukin 6                            | +<br>− | GATGGATGCTACCAAACTGGA<br>GGAAATTGGGGTAGGAAGGA      | [2]       |
| Gapdh     | Glyceraldehyde 3-phosphate dehydrogenase | +<br>− | TGTGTCCGTCGTGGATCTGA<br>CCTGCTTCACCACCTTCTTGA      | [3]       |
| Actg1     | Actin Gamma 1                            | +<br>− | ACCAACAGCAGACTTCCAGGAT<br>AGACTGGCAAGAAGGAGTGG-TAA | [4]       |
| Cd68      | CD68 Molecule                            | +<br>− | CTTCCCACAGGCAGCACAG<br>AATGATGAGAGGCAGCAA-GAGG     | [3]       |

**Supplementary Table S2.** TaqMan primer names and catalog numbers.

| Gene Name     | Full Name                            | Supplier                        | Catalog Number |
|---------------|--------------------------------------|---------------------------------|----------------|
| <i>Spp1</i>   | Osteopontin                          | Thermo Fisher, Waltham, MA, USA | Mm00436767_m1  |
| <i>Agt</i>    | Angiotensinogen                      | Thermo Fisher, Waltham, MA, USA | Mm00599662_m1  |
| <i>Vegfa</i>  | Vascular Endothelial Growth Factor A | Thermo Fisher, Waltham, MA, USA | Mm01281449_m1  |
| <i>Il18</i>   | Interleukin 18                       | Thermo Fisher, Waltham, MA, USA | Mm00434226_m1  |
| <i>Tlr4</i>   | Toll Like Receptor 4                 | Thermo Fisher, Waltham, MA, USA | Mm00445273_m1  |
| <i>Ccl2</i>   | X-C Motif Chemokine Ligand 2         | Thermo Fisher, Waltham, MA, USA | Mm00441242_m1  |
| <i>Lcn2</i>   | Lipocalin 2                          | Thermo Fisher, Waltham, MA, USA | Mm01324470_m1  |
| <i>Cxcl10</i> | C-X-C Motif Chemokine Ligand 10      | Thermo Fisher, Waltham, MA, USA | Mm00445235_m1  |
| <i>Nos2</i>   | Nitric Oxide Synthase 2              | Thermo Fisher, Waltham, MA, USA | Mm00468487_m1  |
| <i>Mhc1</i>   | Major Histocompatibility Complex 1   | Thermo Fisher, Waltham, MA, USA | Mm01309902_m1  |

**Supplementary Table S3.** Sample size and duration of diabetes per NOD mouse group at euthanasia.

| Group†  | 7 Weeks Post Exposure | Weeks Diabetic‡ | 12 Weeks Post Exposure | Weeks Diabetic‡ | 17 Weeks Post Exposure | Weeks Diabetic‡ |
|---------|-----------------------|-----------------|------------------------|-----------------|------------------------|-----------------|
| V(-) ND | 3                     |                 | 3                      |                 | 3                      |                 |
| V(-) DB | 3                     | 2,3,7           | 3                      | 1,6,7           | 2                      | 3,3             |
| V(+) ND | 3                     |                 | 3                      |                 | 3                      |                 |
| V(+) DB | 1                     | 5               | 4                      | 5,7,8,9         | 2                      | 14,14           |

† V(-) ND = Non-Exposed/Non-Diabetic; V(-) DB = Non-Exposed/Diabetic; V(+) ND = Virus-Exposed/Non-Diabetic; V(+) DB = Virus-Exposed/Diabetic.‡ Measured by the number of glucose readings above 250mg/dL prior to euthanasia

**Supplementary Table S4.** NMDS1 and NMDS2 species scores for each parameter.

| Gene Name                | MDS1     | MDS2     |
|--------------------------|----------|----------|
| <i>Fn1</i>               | 0.078974 | -0.10507 |
| <i>Havcr1</i>            | 0.094793 | -0.09177 |
| <i>Vegfa</i>             | 0.008206 | -0.04695 |
| Body Weight              | -0.07569 | -0.04397 |
| <i>Spp1</i>              | -0.04766 | -0.04079 |
| <i>Tlr4</i>              | 0.025125 | -0.03933 |
| <i>Tlr3</i>              | 0.003621 | -0.03766 |
| <i>Tgfb</i>              | 0.063486 | -0.03173 |
| <i>Nos2</i>              | 0.057767 | -0.02846 |
| <i>Il18</i>              | 0.004907 | -0.02832 |
| Kidney Weight            | -0.12466 | -0.00782 |
| SrCr                     | -0.09726 | 0.010299 |
| <i>Cd68</i>              | 0.073767 | 0.01456  |
| <i>Ccl2</i>              | 0.197826 | 0.027797 |
| Normalized Kidney Weight | -0.11768 | 0.030018 |
| <i>Ifnb</i>              | 0.054015 | 0.031058 |

|               |          |          |
|---------------|----------|----------|
| <i>Mhc1</i>   | 0.016621 | 0.043313 |
| <i>Il6</i>    | 0.181237 | 0.043341 |
| <i>Cxcl10</i> | -0.00561 | 0.096404 |
| <i>Agt</i>    | -0.15425 | 0.11908  |
| <i>Lcn2</i>   | 0.125138 | 0.124897 |
| <i>Tnfa</i>   | 0.291052 | 0.143158 |
| UACR          | -0.1869  | 0.158651 |

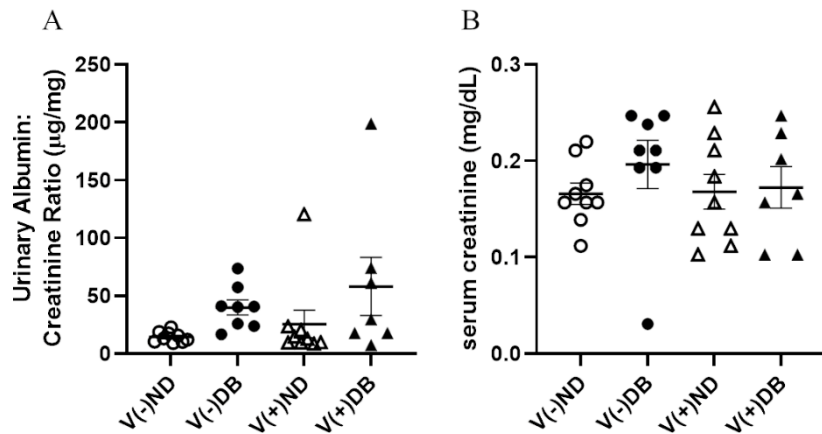

**Supplementary Figure S1.** Urine albumin and creatinine excretion and serum creatinine levels. (A) UACR and (B) serum creatinine were measured and compared across all four NOD mouse groups ( $n = 7-9$ ;  $\circ$ V(-)ND,  $\bullet$ V(-)DB,  $\triangle$ V(+ )ND,  $\blacktriangle$ V(+ )DB).

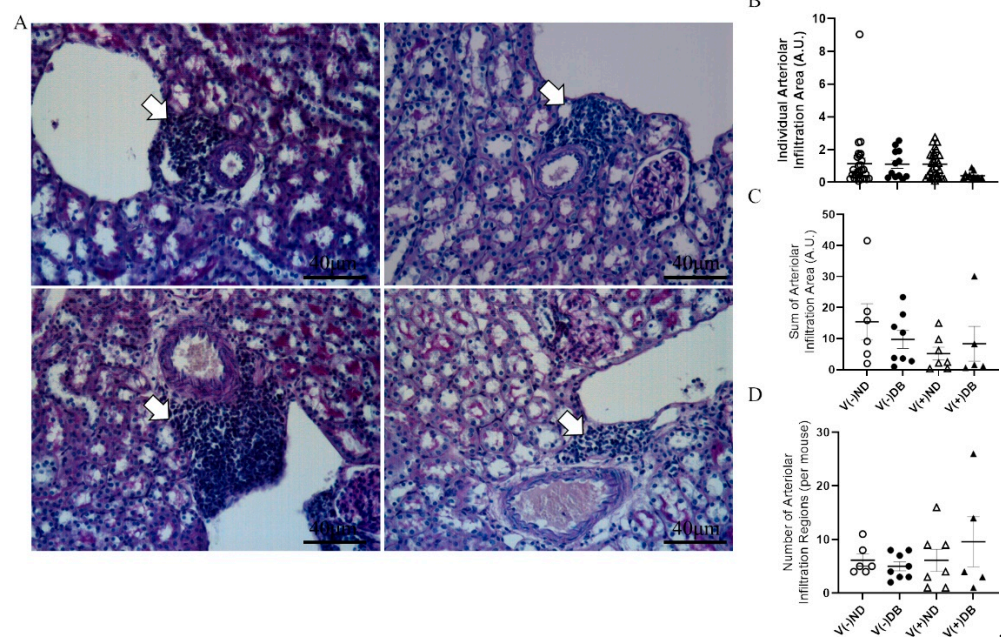

**Supplementary Figure S2.** Immune Cell Infiltration. (A) Representative images of Periodic acid-Schiff staining of non-exposed (upper two panels) and CVB4-exposed (lower two panels) NOD mouse kidneys without (left two panels) and with diabetes (right two panels). Plots of infiltration (B) individual areas, (C) area sum and (D) number of locations per three kidney sections per mouse. Arrowheads point to immune cell infiltration. Images taken at 200 $\times$  magnification ( $n = 30-65$ ;  $\circ$  V(-)ND,  $\bullet$ V(-)DB,  $\triangle$ V(+ )ND,  $\blacktriangle$ V(+ )DB).

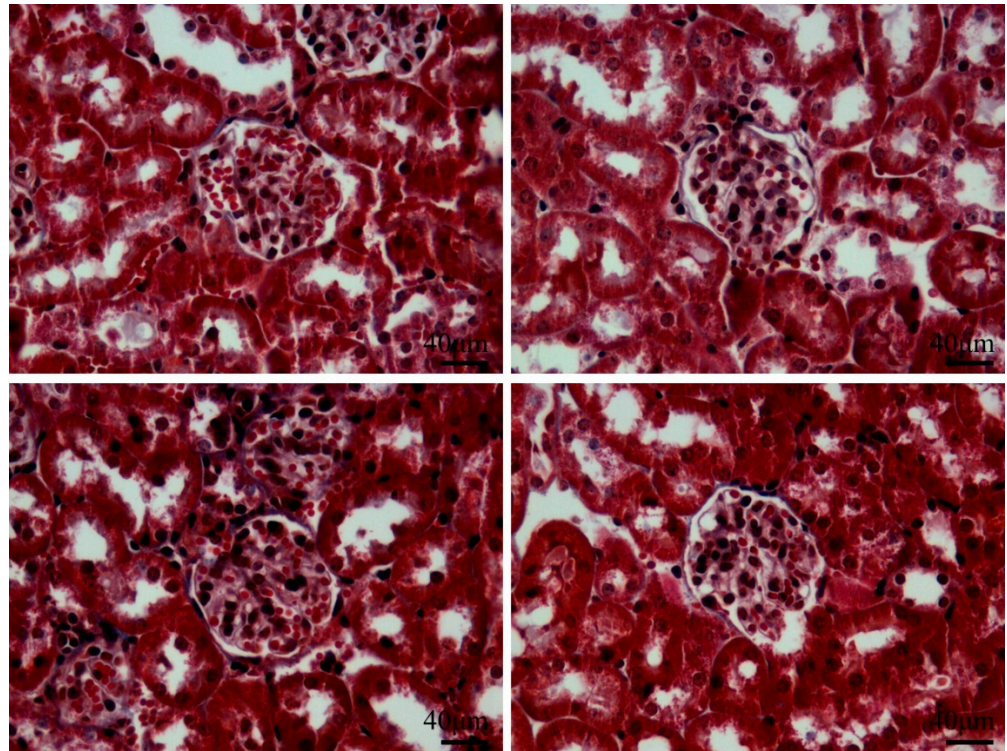

**Supplementary Figure S3.** Fibrosis evaluation following CVB4 exposure. Representative images of Masson's Trichrome stain of non-exposed (upper two panels) and CVB4-exposed (lower two panels) NOD mouse kidneys without (left two panels) and with diabetes (right two panels). Images taken at 400× magnification.

## Reference

1. Walter, D.L.; Benner, S.E.; Oaks, R.J.; Thuma, J.R.; Malgor, R.; Schwartz, F.L.; Coschigano, K.T.; McCall, K. Coxsackievirus B4 Exposure Results in Variable Pattern Recognition Response in the Kidneys of Female Non-Obese Diabetic Mice Before Establishment of Diabetes. *Viral Immunol.* **2020**, *33*, 494–506, doi:10.1089/vim.2019.0188.
2. Ye, J.; Coulouris, G.; Zaretskaya, I.; Cutcutache, I.; Rozen, S.; Madden, T.L. Primer-BLAST: A Tool to Design Target-Specific Primers for Polymerase Chain Reaction. *BMC Bioinformatics* **2012**, *13*, 134, doi:10.1186/1471-2105-13-134.
3. Fujimoto, M.; Maezawa, Y.; Yokote, K.; Joh, K.; Kobayashi, K.; Kawamura, H.; Nishimura, M.; Roberts, A.B.; Saito, Y.; Mori, S. Mice Lacking Smad3 Are Protected against Streptozotocin-Induced Diabetic Glomerulopathy. *Biochem. Biophys. Res. Commun.* **2003**, *305*, 1002–1007, doi:10.1016/s0006-291x(03)00885-4.
4. Lefever, S.; Vandesompele, J.; Speleman, F.; Pattyn, F. RTPrimerDB: The Portal for Real-Time PCR Primers and Probes. *Nucleic Acids Res.* **2009**, *37*, D942–945, doi:10.1093/nar/gkn777.
